# Supplementary material for: Functionalisation of Silicone by Drug-Embedded Chitosan Nanoparticles for Potential Applications in Otorhinolaryngology
Source: PubMed Central journal article supplement (PMC6471903; doi:10.3390/ma12060847), 2019-03-13
Supplement: materials-12-00847-s001.pdf [file materials-12-00847-s001.pdf]

# Supplementary Materials

Weibull model and Korsmeyer-Peppas model data

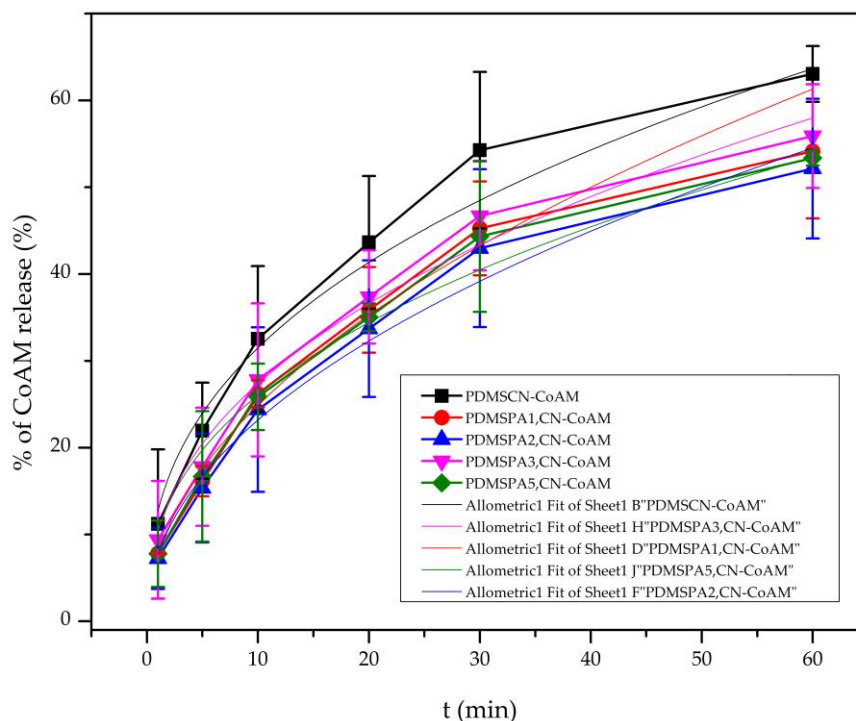

**Figure S1.** Time dependent change in the percentage of the released incorporated drug with Weibull model fitting graph.

**Table S1.** Weibull model fitting data.

| Model                         | ExpDec                          |           |                |         |         |
|-------------------------------|---------------------------------|-----------|----------------|---------|---------|
| Equation                      | $y = A1 \cdot \exp(-x/t1) + y0$ |           |                |         |         |
| Reduced Chi-Sqr               | 1.92182                         | 2.29953   | 1.00015        | 1.82172 | 2.72962 |
| Adj. R-Square                 | 0.94070                         | 0.97292   | 0.97202        | 0.96527 | 0.98618 |
|                               |                                 | Value     | Standard Error |         |         |
| PDMS <sub>CN</sub> -CoAM      | y0                              | 100.06891 | 4.78741        |         |         |
|                               | A1                              | -74.48291 | 5.65544        |         |         |
|                               | t1                              | 115.83608 | 25.00505       |         |         |
|                               | k                               | 0.00863   | 0.00186        |         |         |
|                               | tau                             | 80.29145  | 17.33218       |         |         |
| PDMS <sub>PA1, CN</sub> -CoAM | y0                              | 84.51165  | 4.66911        |         |         |
|                               | A1                              | -78.74108 | 4.63205        |         |         |
|                               | t1                              | 37.88751  | 5.52422        |         |         |
|                               | k                               | 0.02639   | 0.00385        |         |         |
|                               | tau                             | 26.26162  | 3.82910        |         |         |
| PDMS <sub>PA2, CN</sub> -CoAM | y0                              | 98.15534  | 4.03156        |         |         |
|                               | A1                              | -87.12768 | 4.69160        |         |         |
|                               | t1                              | 124.53892 | 21.81387       |         |         |

|                               |     |           |                          |
|-------------------------------|-----|-----------|--------------------------|
| PDMS <sub>PA3</sub> , CN-CoAM | k   | 0.00803   | 0.00141                  |
|                               | tau | 86.32380  | 15.12022                 |
|                               | y0  | 101.20670 | 2.73233                  |
|                               | A1  | -80.19450 | 4.59340                  |
|                               | t1  | 142.04842 | 18.26431                 |
| PDMS <sub>PA5</sub> , CN-CoAM | k   | 0.00704   | $9.05170 \times 10^{-4}$ |
|                               | tau | 98.46046  | 12.65985                 |
|                               | y0  | 99.61290  | 1.62852                  |
|                               | A1  | -80.43160 | 3.61425                  |
|                               | t1  | 109.90672 | 11.42621                 |
|                               | k   | 0.00910   | $9.45919 \times 10^{-4}$ |
|                               | tau | 76.18153  | 7.92005                  |

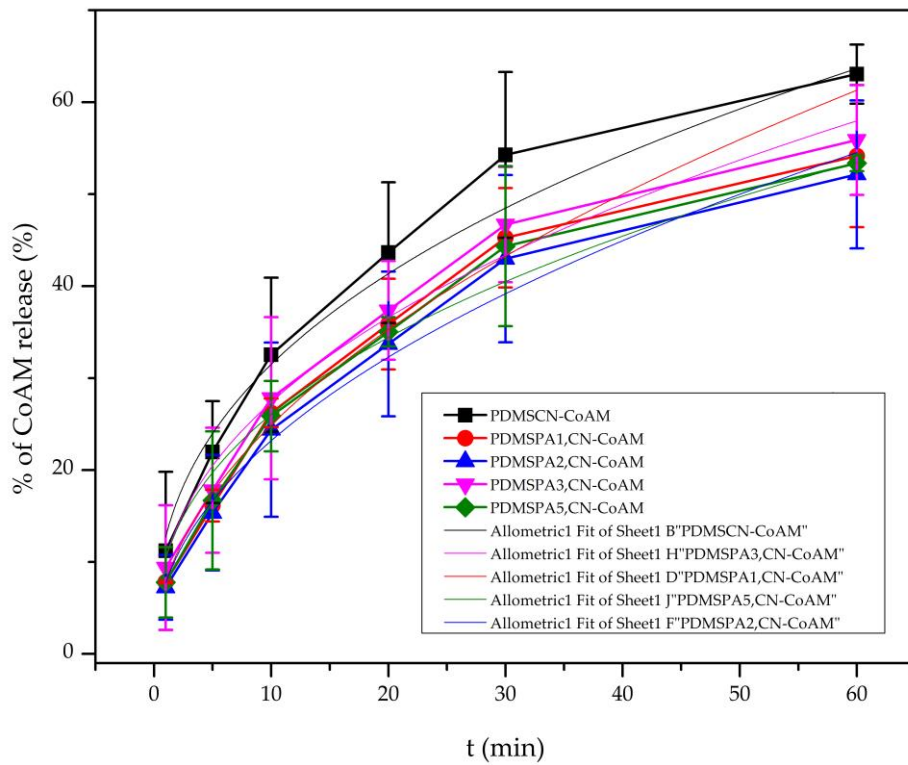

**Figure S2.** Time dependent change in the percentage of the released incorporated drug with Korsmeyer-Peppas model fitting graph.

**Table S2.** Korsmeyer-Peppas model fitting data.

| Model                         | Allometric        |          |                |         |         |
|-------------------------------|-------------------|----------|----------------|---------|---------|
| Equation                      | $y = a \cdot x^b$ |          |                |         |         |
| Reduced Chi-Sqr               | 0.17949           | 0.60260  | 0.09399        | 0.15151 | 0.24376 |
| Adj. R-Square                 | 0.98650           | 0.98900  | 0.98804        | 0.97963 | 0.99534 |
|                               |                   | Value    | Standard Error |         |         |
| PDMS <sub>CN</sub> -CoAM      | a                 | 12.74275 | 1.44202        |         |         |
|                               | b                 | 0.39287  | 0.02919        |         |         |
| PDMS <sub>PA1</sub> , CN-CoAM | a                 | 7.81056  | 0.11223        |         |         |
|                               | b                 | 0.50322  | 0.01350        |         |         |

---

|                                    |          |          |         |
|------------------------------------|----------|----------|---------|
| <b>PDMS<sub>PA2</sub>, CN-CoAM</b> | <b>a</b> | 7.72702  | 0.78297 |
|                                    | <b>b</b> | 0.47723  | 0.02930 |
| <b>PDMS<sub>PA3</sub>, CN-CoAM</b> | <b>a</b> | 10.42918 | 1.30988 |
|                                    | <b>b</b> | 0.41895  | 0.03549 |
| <b>PDMS<sub>PA5</sub>, CN-CoAM</b> | <b>a</b> | 10.34756 | 0.72216 |
|                                    | <b>b</b> | 0.40109  | 0.01759 |

---
